# Supplementary material for: Highly efficient self-trapped exciton luminescence of Sb3+-doped (CH6N3)3BiCl6 for ethanol detection
Source: Royal Society of Chemistry journal article supplement (doi:10.1039/d3tc04499h), 2024-01-01
Supplement: d3tc04499h1.pdf [file d3tc04499h1.pdf]

## Electronic Supplementary Information

### Highly efficient self-trapped exciton luminescence of Sb<sup>3+</sup>-doped (CH<sub>6</sub>N<sub>3</sub>)<sub>3</sub>BiCl<sub>6</sub> for ethanol detection

Bo Lian<sup>a</sup>, Jiandong Yao<sup>a</sup>, Miao Ren<sup>a</sup>, Bingsuo Zou<sup>a</sup>, Binbin Luo<sup>b,\*</sup>, and Ruosheng Zeng<sup>a,\*</sup>

<sup>a</sup>*State Key Laboratory of Featured Metal Materials and Life-cycle Safety for Composite Structures,  
School of Physical Science and Technology, Guangxi University, Nanning 530004, China*

<sup>b</sup>*Department of Chemistry and Key Laboratory for Preparation and Application of Ordered  
Structural Materials of Guangdong Province, Shantou University, Shantou, Guangdong 515063,  
China*

Corresponding authors: zengrsh@guet.edu.cn (R.Z.), bbluo@stu.edu.cn (B.L.)

## Experimental methods

### Chemicals

Guanidine Hydrochloride ( $\text{CH}_5\text{N}_3\cdot\text{HCl}$ , 99%), bismuth chloride ( $\text{BiCl}_3$ ), antimony trichloride ( $\text{SbCl}_3$ ), methanol ( $\text{MeOH}$ , 99.5%) was purchased from Macklin. Hydrochloric acid ( $\text{HCl}$ , 37 wt% in water) was purchased from Sinopharm Chemical Reagent Co., Ltd. Ethanol ( $\text{EtOH}$ , 99%) was purchased from Nanning Blue Sky Experimental Equipment Co., Ltd. All chemicals were used directly without further purification.

### Synthesis

#### Synthesis of Sb-doped $(\text{CH}_6\text{N}_3)_3\text{BiCl}_6$ bulk single crystals

High quality Sb doped  $(\text{CH}_6\text{N}_3)_3\text{BiCl}_6$  bulk single crystals were synthesized by natural room temperature evaporation crystallization. Clear precursor solutions were also obtained by heating and stirring a mixture of  $\text{CH}_6\text{N}_3\cdot\text{HCl}$ :  $[\text{BiCl}_3+\text{SbCl}_3]$ : methanol:  $\text{HCl}$  = 3.00 mmol: 1.00 mmol: 2.00 mL: 0.1 mL was stirred at 50 °C for 20 min. And then the hot clear precursor solution was cooled to room temperature and evaporated in an undisturbed environment. After 24-72 hours, high-quality bulk single crystals slowly grow out without any disturbance.

#### The preparation of LED lamp base on 20%Sb-doped $(\text{CH}_6\text{N}_3)_3\text{BiCl}_6$ powder

The synthesized microcrystal powder was mixed with UV curable resin, then the mixture was coated on a commercial 365 nm UV GaN LED chip, and cured under UV light to make an LED lamp.

#### Experimental process of single-crystal resolution

The crystals are tested on a "CCD area detector" diffractometer at 296.15 K. The structure is solved using Olex2. The structural solution program utilizes charge flipping, and refinement is performed with the XL refinement package using least squares minimization.

### Characterizations

The crystal structure was characterized by X-ray powder diffraction (XRD, Bruker D8 Discover). The elemental composition and chemical state were identified by X-ray

photoelectron spectroscopy (XPS, Thermo Fisher Scientific ESCALAB 250Xi). The scanning electron microscopy (SEM, Hitachi SU8020) was used to observe the morphology. The photoluminescence (PL), photoluminescence excitation (PLE) spectrum, time-resolved photoluminescence (TRPL), photoluminescence quantum yields (PLQYs), temperature-dependent PL spectra, and temperature-dependent PL decay curve were obtained on the Edinburgh FLS-1000 spectrofluorometer and Horiba Jobin Yvon Fluorolog-3 spectrometer. The Lambda 750 ultraviolet-visible spectrophotometer was used to measure the absorption spectrum. The photoelectric properties of the as-fabricated LED device, including the emission spectra, correlated color temperature (CCT), and Commission Internationale de L'Eclairage (CIE) chromaticity coordinate were obtained on an ATA-1000 (Everfine, China) optoelectronic analyzer.

### **Computational Methods**

All calculations at density functional theory are carried out using the Vienna Ab initio simulation package (VASP)<sup>1</sup> The generalized gradient approximation of the Perdew–Burke–Ernzerhof (PBE)<sup>2, 3</sup> parameterization with projector-augmented wave<sup>4</sup> method are performed for the exchange and correlation functional. The kinetic-energy cutoff of 450 eV and a  $2\times 1\times 2$  Monkhorst–Pack k-mesh for the wavefunction basis set is employed. For the elements C, H, N, Bi, Sb and Cl, ultra-soft pseudopotentials are used. The energy convergence criterion is set as  $1.0\times 10^{-5}$  eV for structural relaxations.

**Table S1.** Bond length and bond angles of  $(\text{CH}_6\text{N}_3)_3\text{BiCl}_6$  Single-crystal.

| Atom-atom      | Bi-Cl1     | Bi-Cl2     | Bi-Cl3     | Bi-Cl4     | Bi-Cl5     | Bi-Cl6     |
|----------------|------------|------------|------------|------------|------------|------------|
| Length/Å       | 2.724      | 2.643      | 2.792      | 2.669      | 2.769      | 2.626      |
| Atom-atom-atom | Cl1-Bi-Cl2 | Cl1-Bi-Cl3 | Cl1-Bi-Cl5 | Cl1-Bi-Cl6 | Cl2-Bi-Cl3 | Cl2-Bi-Cl4 |
| Angle/°        | 87.78      | 88.11      | 91.03      | 93.17      | 89.81      | 92.44      |
| Atom-atom-atom | Cl2-Bi-Cl6 | Cl3-Bi-Cl4 | Cl3-Bi-Cl5 | Cl4-Bi-Cl5 | Cl6-Bi-Cl4 | Cl5-Bi-Cl6 |
| Angle/°        | 88.64      | 89.77      | 88.78      | 88.71      | 88.95      | 92.80      |

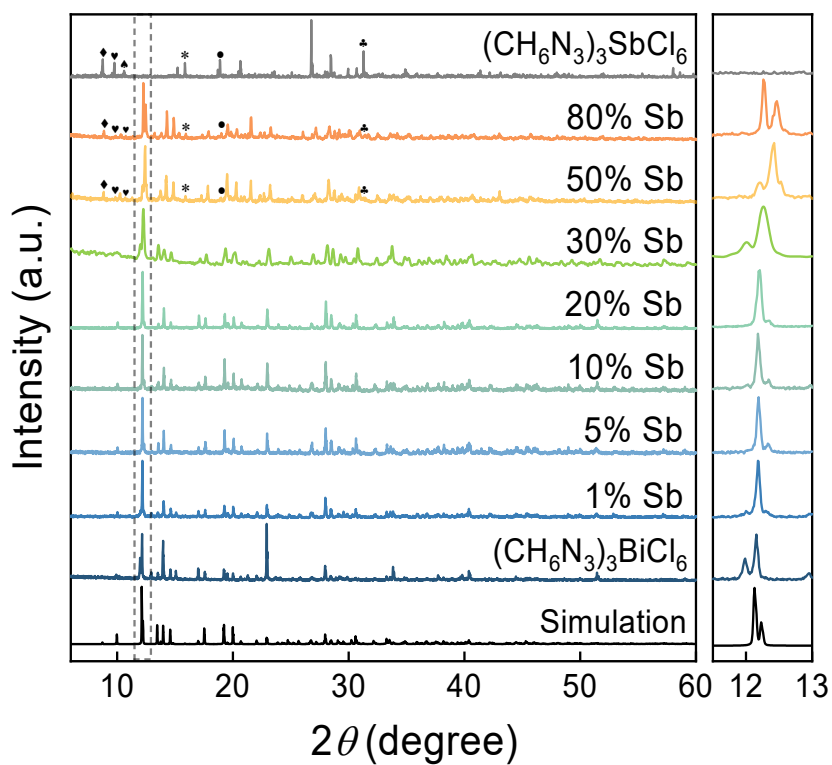

**Fig. S1** PXRD patterns of  $\text{Sb}^{3+}:(\text{CH}_6\text{N}_3)_3\text{BiCl}_6$  with different Sb-feeding concentration.

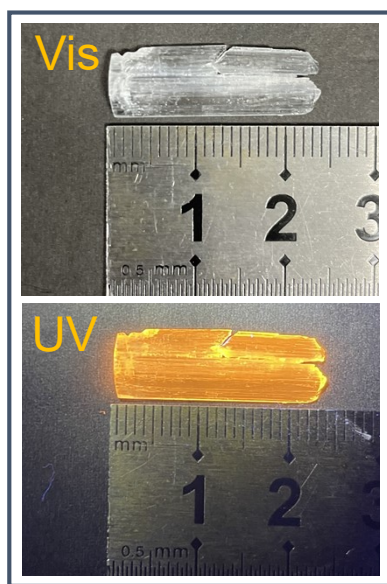

**Fig. S2** Photograph of 5% $\text{Sb}^{3+}$ :  $(\text{CH}_6\text{N}_3)_3\text{BiCl}_6$  crystal under daylight and 365-nm UV lamp.

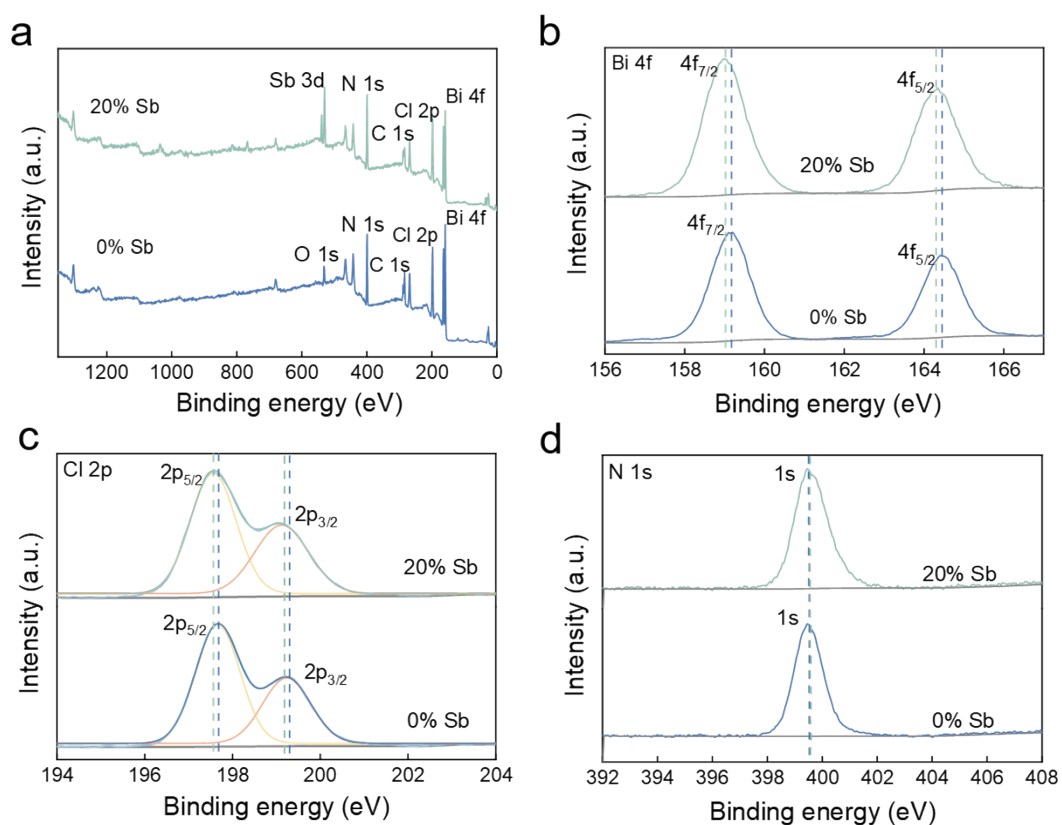

**Fig. S3** (a) Total XPS spectra of pristine  $(\text{CH}_6\text{N}_3)_3\text{BiCl}_6$  and 20% $\text{Sb}^{3+}$ : $(\text{CH}_6\text{N}_3)_3\text{BiCl}_6$ . High-resolution XPS spectra and peak fitting for (b) Bi, (c) Cl, and (d) N of pristine  $(\text{CH}_6\text{N}_3)_3\text{BiCl}_6$  and 20% $\text{Sb}^{3+}$ : $(\text{CH}_6\text{N}_3)_3\text{BiCl}_6$ , respectively.

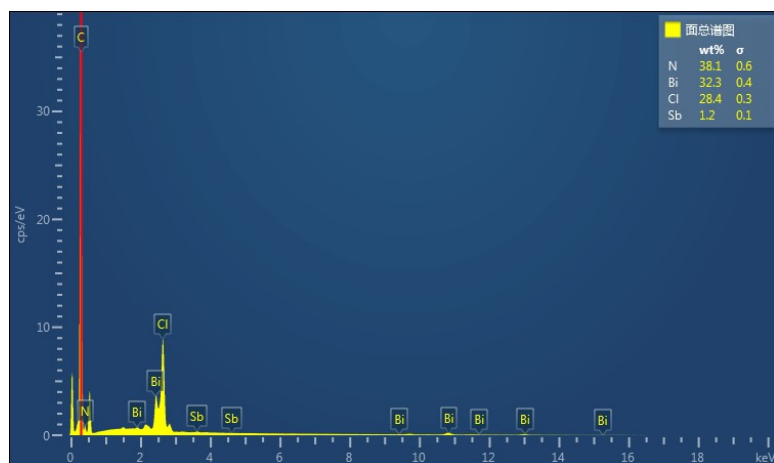

Fig.S4 The energy disperse spectra of 10% $\text{Sb}^{3+}:(\text{CH}_6\text{N}_3)_3\text{BiCl}_6$ .

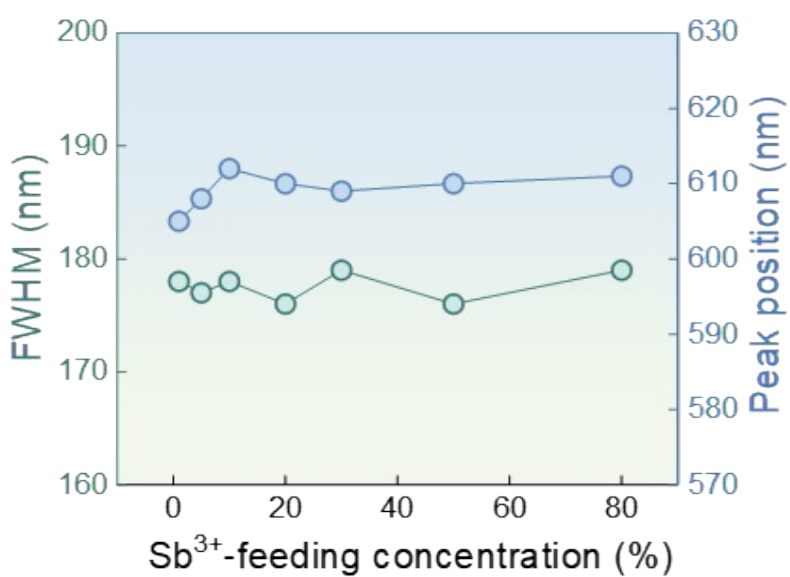

**Fig. S5** FWHM and peak position of  $\text{Sb}^{3+}:(\text{CH}_6\text{N}_3)_3\text{BiCl}_6$  with different Sb-feeding concentration.

**Table S1.** Summary of the space group, PLQY and bandgap of Bi-based HMHs.

| Materials                                                                                              | PLQY   | Space group               | Ref.      |
|--------------------------------------------------------------------------------------------------------|--------|---------------------------|-----------|
| Eu <sup>3+</sup> : Cs <sub>3</sub> Bi <sub>2</sub> Br <sub>9</sub>                                     | 42.4%  | <i>P3m1</i>               | 5         |
| Cs <sub>3</sub> BiI <sub>6</sub>                                                                       | 1.57%  | <i>P6<sub>3</sub>/mmc</i> | 6         |
| Mn <sup>2+</sup> : Cs <sub>2</sub> NaBiCl <sub>6</sub>                                                 | 15%    | <i>Fm3m</i>               | 7         |
| Al <sup>3+</sup> : Cs <sub>2</sub> AgBiCl <sub>6</sub>                                                 | 17.2%  | <i>Fm3m</i>               | 8         |
| Rb <sub>7</sub> Bi <sub>3</sub> Cl <sub>16</sub>                                                       | 28%    | <i>P-31c</i>              | 9         |
| MA <sub>3</sub> Bi <sub>2</sub> Br <sub>9</sub>                                                        | 12%    | <i>P3m1</i>               | 10        |
| (PMA) <sub>3</sub> BiBr <sub>6</sub>                                                                   | <1%    | <i>P2<sub>1</sub>/c</i>   | 11        |
| Sb <sup>3+</sup> : (C <sub>8</sub> NH <sub>12</sub> ) <sub>4</sub> BiBr <sub>7</sub> ·H <sub>2</sub> O | 0.45%  | <i>P1</i>                 | 12        |
| Sb <sup>3+</sup> : (TMEDA) <sub>3</sub> Bi <sub>2</sub> Cl <sub>12</sub> ·H <sub>2</sub> O             | 38%    | <i>P2<sub>1</sub>/n</i>   | 13        |
| Sb <sup>3+</sup> : (CH <sub>6</sub> N <sub>3</sub> ) <sub>3</sub> BiCl <sub>6</sub>                    | 53.27% | <i>P2<sub>1</sub>/n</i>   | this work |

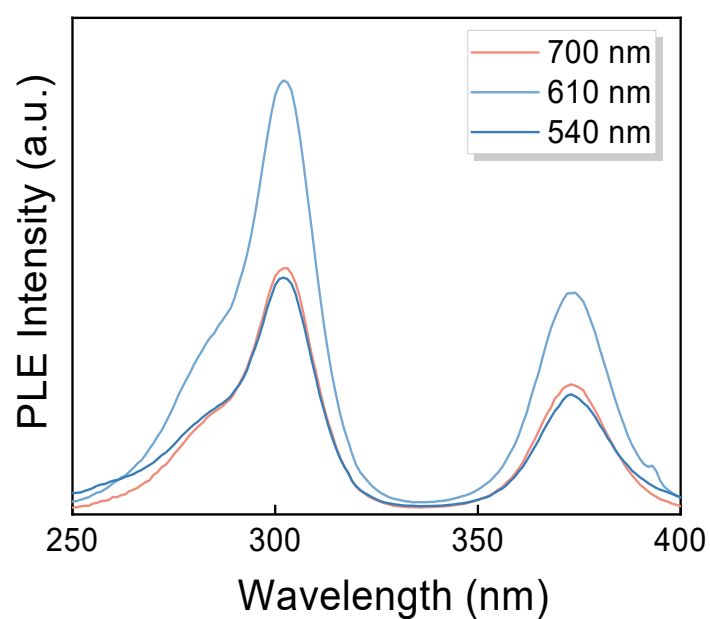**Fig. S6** PL excitation (PLE) ( $\lambda_{\text{em}}$ =540 nm, 610 nm, 700 nm) spectra of 20%Sb<sup>3+</sup>:(CH<sub>6</sub>N<sub>3</sub>)<sub>3</sub>BiCl<sub>6</sub>.

**Table S2.** The PL lifetime fitting results of  $x\%\text{Sb}^{3+}:(\text{CH}_6\text{N}_3)_3\text{BiCl}_6$ .

| $x\%\text{Sb}$ | A1(%) | $\tau_1(\mu\text{s})$ | A2(%) | $\tau_2(\mu\text{s})$ | $\tau_{\text{ave}}(\mu\text{s})$ |
|----------------|-------|-----------------------|-------|-----------------------|----------------------------------|
| 1              | 96.11 | 3.76                  | 3.89  | 15.95                 | 5.54                             |
| 5              | 97.29 | 3.37                  | 2.71  | 21.31                 | 5.72                             |
| 10             | 97.25 | 3.96                  | 2.75  | 20.38                 | 6.05                             |
| 20             | 95.48 | 3.34                  | 4.52  | 20.51                 | 7.23                             |
| 30             | 93.17 | 3.42                  | 6.83  | 11.57                 | 5.03                             |
| 50             | 92.96 | 2.77                  | 7.04  | 11.91                 | 5.02                             |
| 80             | 85.82 | 2.35                  | 14.18 | 8.72                  | 4.78                             |

**Table S3.** Temperature-dependent PL lifetime fitting results of  $\text{Sb}^{3+}:(\text{CH}_6\text{N}_3)_3\text{BiCl}_6$ .

| Temperature (K) | A    | $\tau(\mu\text{s})$ |
|-----------------|------|---------------------|
| 100             | 0.28 | 4.26                |
| 140             | 0.35 | 4.02                |
| 180             | 0.46 | 3.69                |
| 220             | 0.49 | 3.26                |
| 260             | 0.41 | 2.99                |
| 300             | 0.35 | 2.57                |
| 320             | 0.25 | 1.77                |
| 380             | 0.15 | 0.97                |

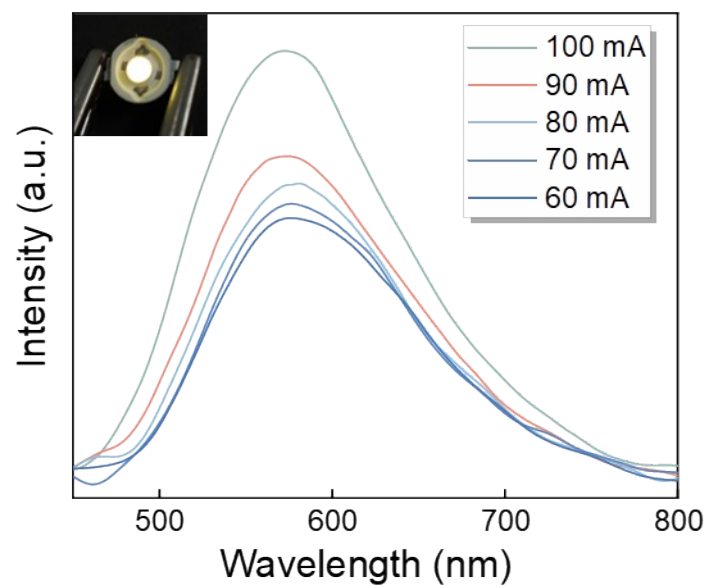

**Fig. S7** The PL spectra of LED were driven at different currents. Inset: working photos of this device.

## Notes and references

1. J. P. Perdew and M. J. P. R. L. Levy, 1983, **51**, 1884.
2. G. Kresse and J. J. P. r. B. Furthmüller, 1996, **54**, 11169.
3. J. P. Perdew, K. Burke and M. J. P. r. l. Ernzerhof, 1996, **77**, 3865.
4. P. E. J. P. r. B. Blöchl, 1994, **50**, 17953.
5. N. Ding, D. Zhou, G. Pan, W. Xu, X. Chen, D. Li, X. Zhang, J. Zhu, Y. Ji and H. Song, *ACS Sustain. Chem. Eng.*, 2019, **7**, 8397-8404.
6. M. Liu, H. Ali-Loytty, A. Hiltunen, E. Sarlin, S. Qudsia, J. H. Smatt, M. Valden and P. Vivo, *Small*, 2021, **17**, e2100101.
7. J. D. Majher, M. B. Gray, T. A. Strom and P. M. Woodward, *Chem. Mater.*, 2019, **31**, 1738-1744.
8. L. Li, H. Shao, X. Wu, W. Chen, J. Zhu, B. Dong, L. Xu, W. Xu, J. Hu, M. Zhou, Y. Ji, H. Song and X. Bai, *Mater. Res. Bull.*, 2022, **147**.
9. J. L. Xie, Z. Q. Huang, B. Wang, W. J. Chen, W. X. Lu, X. Liu and J. L. Song, *Nanoscale*, 2019, **11**, 6719-6726.
10. Q. Li, L. Yin, Z. Chen, K. Deng, S. Luo, B. Zou, Z. Wang, J. Tang and Z. Quan, *Inorg. Chem.*, 2019, **58**, 1621-1626.
11. D. Chen, F. Dai, S. Hao, G. Zhou, Q. Liu, C. Wolverton, J. Zhao and Z. Xia, *J. Mater. Chem. C*, 2020, **8**, 7322-7329.
12. R. Zhang, X. Mao, Y. Yang, S. Yang, W. Zhao, T. Wumaier, D. Wei, W. Deng and K. Han, *Angew. Chem.-Int. Edit.*, 2019, **58**, 2725-2729.
13. J. Cao, J. Lin, K. Liu, Y. Xiong, N. Wang, S. He, X. Zhang, Z. Guo, X. Chen, J. Zhao and Q. Liu, *J. Mater. Chem. C*, 2022, **10**, 9841-9848.
